# Supplementary material
Source: HighWire-hosted journal article supplement (https://www.annfammed.org/highwire/filestream/8962/field_highwire_adjunct_files/0/de_Bont_Supp_Tables_1-3.pdf)
Supplement: de_Bont_Supp_Tables_1-3.pdf [file de_Bont_Supp_Tables_1-3.pdf]

## **SUPPLEMENTAL MATERIALS FOR**

de Bont EG, Dinant G, Elshout G, et al. Booklet for childhood fever in out-of-hours primary care: a cluster-randomized controlled trial. *Ann Fam Med*. 2018;16(4):314-321.

## SUPPLEMENTARY TABLES

**Table 1. Top 3 non-antibiotic prescriptions**

|                             | Control<br>n= 13410 | Access to booklet<br>n= 11945 | Use of booklet<br>n= 3407 |
|-----------------------------|---------------------|-------------------------------|---------------------------|
| Xylomethazoline nasal spray | 366 (2.7%)          | 200 (1.7%)                    | 65 (1.9%)                 |
| Salbutamol inhaler          | 313 (2.3%)          | 248 (2.1%)                    | 56 (1.6%)                 |
| Ibuprofen                   | 99 (0.7%)           | 97 (0.8%)                     | 22 (0.7%)                 |

**Table 2. Patient characteristics between FP access to booklet vs. actual use of booklet**

|                                                | Use of booklet<br>n=3407 | No use of booklet<br>n=8538 | Access to booklet<br>n= 11945 |
|------------------------------------------------|--------------------------|-----------------------------|-------------------------------|
| Age in years - <i>Mean (SD)</i>                | 2.9 ( $\pm$ 2.4)         | 3.4 ( $\pm$ 2.7)            | 3.3 ( $\pm$ 2.7)              |
| Male sex- <i>n= (%)</i>                        | 1786 (52.4%)             | 4527 (53.0%)                | 6313 (52.9%)                  |
| Socioeconomic status parents                   |                          |                             |                               |
| - Low                                          | 574 (17.1%)              | 1252 (14.8%)                | 1826 (15.4%)                  |
| - Middle                                       | 2360 (70.1%)             | 6099 (72.0%)                | 8459 (71.5%)                  |
| - High                                         | 431 (12.8%)              | 1119 (13.2%)                | 1550 (13.1%)                  |
| <b>ICPC top 3</b>                              |                          |                             |                               |
| A03.00 Fever                                   | 832 (24.4%)              | 1342 (15.8%)                | 2174 (18.2%)                  |
| R74.00 Acute upper respiratory tract infection | 788 (23.1%)              | 1569 (18.4%)                | 2357 (19.9%)                  |
| H71.00 Acute otitis media acuta/myringitis     | 449 (13.2%)              | 1155 (13.6%)                | 1604 (13.5%)                  |

*SD = standard deviation*

**Table 3. Patient characteristics between telephone survey and total population**

|                                                | Telephone survey<br>n=553 | Total<br>N=25355 |
|------------------------------------------------|---------------------------|------------------|
| Age in years - <i>Median (IQR)</i>             | 3.5 ( $\pm$ 2.6)          | 3.2 ( $\pm$ 2.7) |
| Male sex- <i>n= (%)</i>                        | 296 (53.5%)               | 13413 (52.9%)    |
| Socioeconomic status parents                   |                           |                  |
| - Low                                          | 77 (14.0%)                | 4087 (16.2%)     |
| - Middle                                       | 406 (73.8%)               | 17514 (69.5%)    |
| - High                                         | 67 (12.2%)                | 3582 (14.2%)     |
| <b>ICPC top 3</b>                              |                           |                  |
| A03.00 Fever                                   | 113 (20.4%)               | 4645 (18.4%)     |
| R74.00 Acute upper respiratory tract infection | 125 (22.6%)               | 5010 (19.8%)     |
| H71.00 Acute otitis media acuta/myringitis     | 85 (15.4%)                | 3476 (13.8%)     |

*Socioeconomic status numbers do not add up to totals in column due to missings*
